# Supplementary material for: Schistocytes Evaluation in Iron Deficiency: An Assessment Adopted From ICSH Nomenclature Guideline
Source: Research Square preprint supplement (doi:10.21203/rs.3.rs-76653/v1), 2020-10-20
Supplement: Supplementary file 1 [file 1b78a3981c60b4bac1f238fb.docx]

**SCHISTOCYTES EVALUATION IN IRON DEFICIENCY: AN ASSESSMENT ADOPTED FROM ICSH NOMENCLATURE GUIDELINE**

Additional File 2


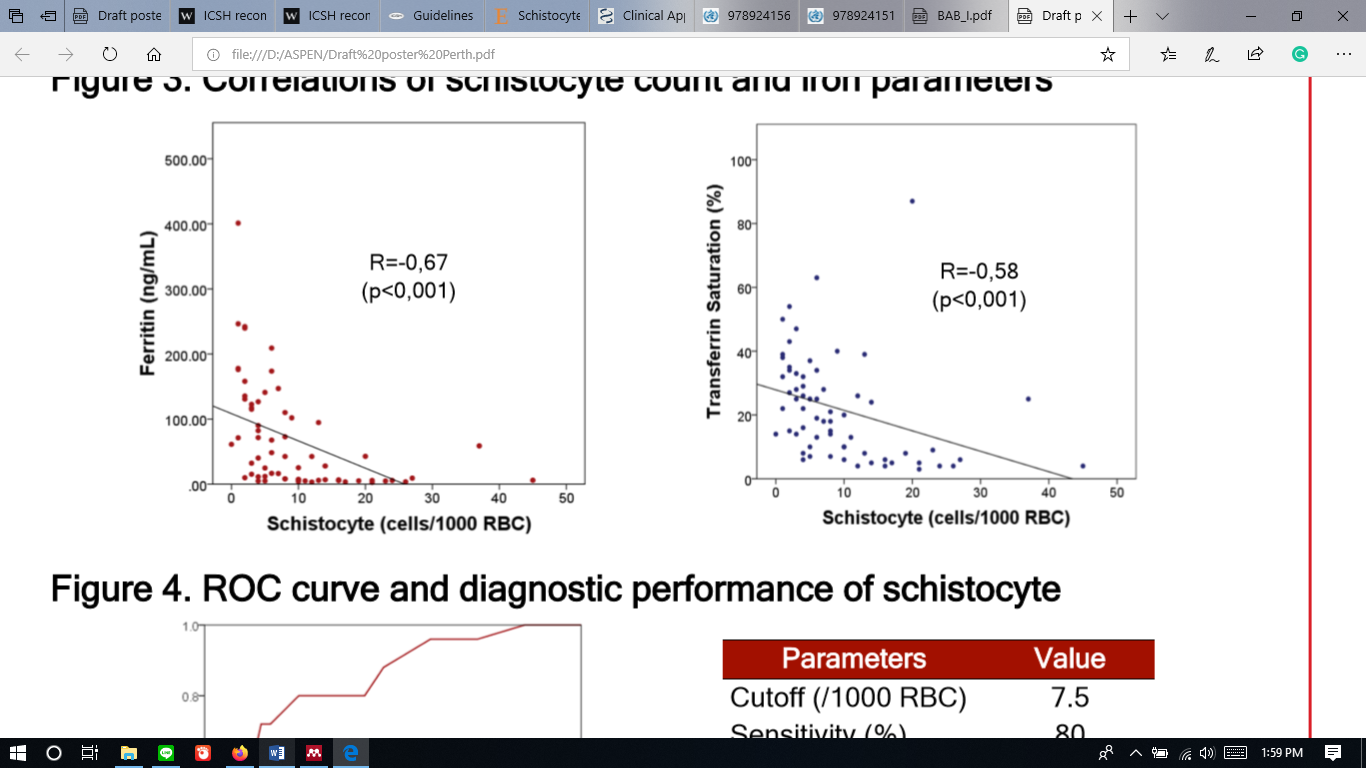


Figure S1. Schistocyte count and iron parameters correlation in the microcytic population
